# Supplementary material for: Adherence to a Gluten Free Diet Is Associated with Receiving Gluten Free Foods on Prescription and Understanding Food Labelling
Source: MDPI journal article supplement (doi:10.3390/nu9070705), 2017-07-06
Supplement: s1 [file s1]

## Questionnaires:

Instruction for filling the form: (Please read these carefully before you complete the form)

1. Please circle or tick the relevant option(s)
2. Where appropriate you may select more than one option
3. Please do not leave any question blank
4. If you do not know the answer, please write “don’t know” or “DK”
5. Please post the questionnaire back to us in the envelope provided.

### Part A:

**1. Sex**                      Male                                      Female

**2. Age**

18–30                      31–40                      41–50                      51–60                      more than 60

**3. Which ethnic group do you belong too?**

European                      Muslim                                      Sikh                                      Hindu

**4. Are you a vegetarian?**

Yes                                      No

**5. At what age were you diagnosed by the hospital to be suffering from coeliac disease?**

18–30                      31–40                      41–50                      51–60                      more than 60

**6. Did you have health problems in childhood?**

Yes                                      No

**7. What prompted you to consult your General Practitioner (GP)? [Please tick relevant option(s)]**

Fatigue/ Hair loss

Stomach pains/ bloating / Skin rash

Poor appetite/ Diarrhoea

Nausea/Vomiting /Mouth ulceration

Weight loss /Family history

Joint pains /Difficulty walking

**8. How long had you been experiencing symptoms before you were diagnosed?**

Less than 6 months      6 months to 1 year      1 year to 3 years      more than 3 years

**9. Did you know what coeliac disease was before you were diagnosed?**

Yes

No

**10. At the time of your diagnosis, what was discussed at your consultation with your hospital doctor? [Please tick relevant option(s)]**

Explained what coeliac disease was

Told me to follow a strict gluten-free diet

Referred me to a dietician

Arranged a follow-up appointment

Gave written information

Other (please state)

**11. Were you satisfied with the information given?**

Yes

No

**12. If you were referred to a dietician, what advice were you given? [Please tick relevant option(s)]**

Explained the diagnosis and the reasons for the diet

Discussed a gluten-free diet

Discussed the Coeliac Society and local groups

Provided an information pack (containing diet sheet, food list, starter packs etc)

Discussed the prescribing of gluten-free products

A follow-up appointment was made

Given a contact telephone number for advice, if needed

**13. Were you satisfied with the information given?**

Yes

No

If “No”, please state why:

**14. Do you think the dietician should play an important role in the long-term management of Coeliac Disease?**

Yes

No

**15. How often do you include gluten containing foods in your diet?**

Never

Once a month

Once a week

Daily

Other please specify

**16. What difficulties do you have in following a gluten-free diet? [Please tick relevant option(s)]**

I don't understand what foods I can and cannot eat

I don't have the time to prepare different meals

Gluten-free foods have an unpleasant taste

Gluten-free foods are expensive to buy

My GP does not prescribe sufficient amounts of gluten-free products

I don't feel any different on a gluten-free diet

I don't understand the labelling on foods

**17. Do you have symptoms when you eat food containing gluten?**

Yes

No

**If yes, what symptoms do you experience? [Please tick relevant option(s)]**

Nausea/vomiting Stomach pains

Diarrhoea Fatigue/tiredness

Mouth ulcers

Others (please specify)

**18. Do you get gluten-free products on prescription?**

Yes

No

**If No, did you know that they are available on prescription?**

Yes

No

**If yes, do you get sufficient amounts of gluten-free products on prescription?**

Yes

No

**19. Are you a member of the Coeliac Society?**

Yes (please go to question 20)

No

**If you are not a member, is it because:- [please tick relevant option(s)]**

You didn't know about it

You have a contact address, but haven't joined yet

You don't feel it is important

If I need advice, I will ask my GP

Other (please specify)

## Part B:

Please circle one option for each question in the columns from 1 to 5.

| <b>Questions</b>                                                                         | 1                | 2                    | 3                          | 4                  | 5                    |
|------------------------------------------------------------------------------------------|------------------|----------------------|----------------------------|--------------------|----------------------|
| Have you been bothered by low energy level during the past 4 weeks?                      | None of the time | A little of the time | Some of the time           | Most of the time   | All of the time      |
| Have you been bothered by headaches during the past 4 weeks?                             | None of the time | A little of the time | Some of the time           | Most of the time   | All of the time      |
| I am able to follow a GFD when dining outside my home                                    | Strongly agree   | Somewhat agree       | Neither agree nor disagree | Somewhat disagree  | Strongly disagree    |
| Before I do something I carefully consider the consequences                              | Strongly agree   | Somewhat agree       | Neither agree nor disagree | Somewhat disagree  | Strongly disagree    |
| I do not consider myself a failure                                                       | Strongly agree   | Somewhat agree       | Neither agree nor disagree | Somewhat disagree  | Strongly disagree    |
| How important to your health are accidental gluten exposures?                            | Very important   | Somewhat important   | Neutral/unsure             | A little important | Not at all important |
| Over the past 4 weeks, how many times have you eaten foods containing gluten on purpose? | 0-never          | 1-2                  | 3-5                        | 6-10               | >10                  |

Thank you for completing the questionnaire. Please use the enclosed stamped addressed envelope to return it to us.
